# Supplementary material
Source: PubMed Central journal article supplement (PMC5571362)

**SUPPLEMENTARY TABLE 1** Cumulative fraction of fosfomycin dose excreted in urine by collection interval for each dosing regimen

| Mean ± SD               |                   |             |             |             |             |             |
|-------------------------|-------------------|-------------|-------------|-------------|-------------|-------------|
| Study drug administered | Cumulative Fe (%) |             |             |             |             |             |
|                         | 0-4 h             | 0-8 h       | 0-12 h      | 0-24 h      | 0-36 h      | 0-48 h      |
| 1 g IV (n=27)           | 52.9 ± 13.2       | 66.1 ± 17.0 | 70.9 ± 17.7 | 73.9 ± 17.8 | 74.1 ± 17.8 | 74.2 ± 17.8 |
| 8 g IV (n=27)           | 57.7 ± 9.3        | 71.7 ± 10.0 | 76.8 ± 10.1 | 79.5 ± 10.3 | 79.8 ± 10.3 | 79.8 ± 10.3 |
| 3 g PO (n=28)           | 13.6 ± 4.7        | 22.6 ± 6.6  | 27.2 ± 7.6  | 32.9 ± 8.1  | 35.7 ± 8.6  | 37.2 ± 9.2  |

Fe, fraction excreted in urine

**SUPPLEMENTARY TABLE 2** Concentrations of fosfomycin in urine following intravenous and oral administration

|                         |               | Scheduled urine collection interval |                |                   |                |                 |                |                 |                |                |                |                |                |                |                |
|-------------------------|---------------|-------------------------------------|----------------|-------------------|----------------|-----------------|----------------|-----------------|----------------|----------------|----------------|----------------|----------------|----------------|----------------|
|                         |               | Mean ± SD                           |                |                   |                |                 |                |                 |                |                |                |                |                |                |                |
|                         |               | Pre-dose                            |                | 0-4 h             |                | 4-8 h           |                | 8-12 h          |                | 12-24 h        |                | 24-36 h        |                | 36-48 h        |                |
| Study drug administered |               | C <sup>a</sup>                      | V <sup>b</sup> | C <sup>a</sup>    | V <sup>b</sup> | C <sup>a</sup>  | V <sup>b</sup> | C <sup>a</sup>  | V <sup>b</sup> | C <sup>a</sup> | V <sup>b</sup> | C <sup>a</sup> | V <sup>b</sup> | C <sup>a</sup> | V <sup>b</sup> |
|                         | 1 g IV (n=27) |                                     | 2.41 ± 1.7     | 182.0 ± 148.2     | 967.1 ± 721.7  | 752.0 ± 390.7   | 396.0 ± 285.4  | 452.5 ± 298.1   | 153.2 ± 103.4  | 426.1 ± 262.8  | 41.3 ± 32.5    | 885.9 ± 501.8  | 3.6 ± 4.3      | 1114.8 ± 661.2 | 2.2 ± 1.8      |
| 8 g IV (n=27)           |               | BLQ                                 | 187.3 ± 228.5  | 15561.5 ± 27766.5 | 654.5 ± 450.0  | 3976.5 ± 3578.9 | 461.0 ± 314.6  | 1443.6 ± 1214.3 | 430.2 ± 296.6  | 389.3 ± 246.4  | 779.5 ± 506.5  | 27.0 ± 20.5    | 1130.9 ± 714.6 | 3.1 ± 1.9      | 738.5 ± 499.8  |
| 3 g PO (n=28)           |               | BLQ                                 | 210.0 ± 164.8  | 1049 ± 867.8      | 615.4 ± 400.3  | 947.5 ± 791.9   | 451.3 ± 272.3  | 541.7 ± 406.8   | 397.5 ± 289.5  | 281.4 ± 189.2  | 845.2 ± 504.5  | 125.8 ± 143.1  | 1041.5 ± 707.9 | 96.5 ± 117.7   | 654.0 ± 391.3  |

<sup>a</sup>µg/mL, <sup>b</sup>mL  
C, concentration; V, volume; BLQ, below the limit of quantitation

**SUPPLEMENTARY FIG 1.** Mean ( $\pm$  SD) concentration-versus-time profile of fosfomycin in plasma after a single 1 hour intravenous infusion of 1 g and 8 g fosfomycin disodium. Intravenous administration of 1 g is illustrated by open circles and a dashed lined and 8 g is illustrated by open diamonds and a dashed line. The y axis is in the log scale.

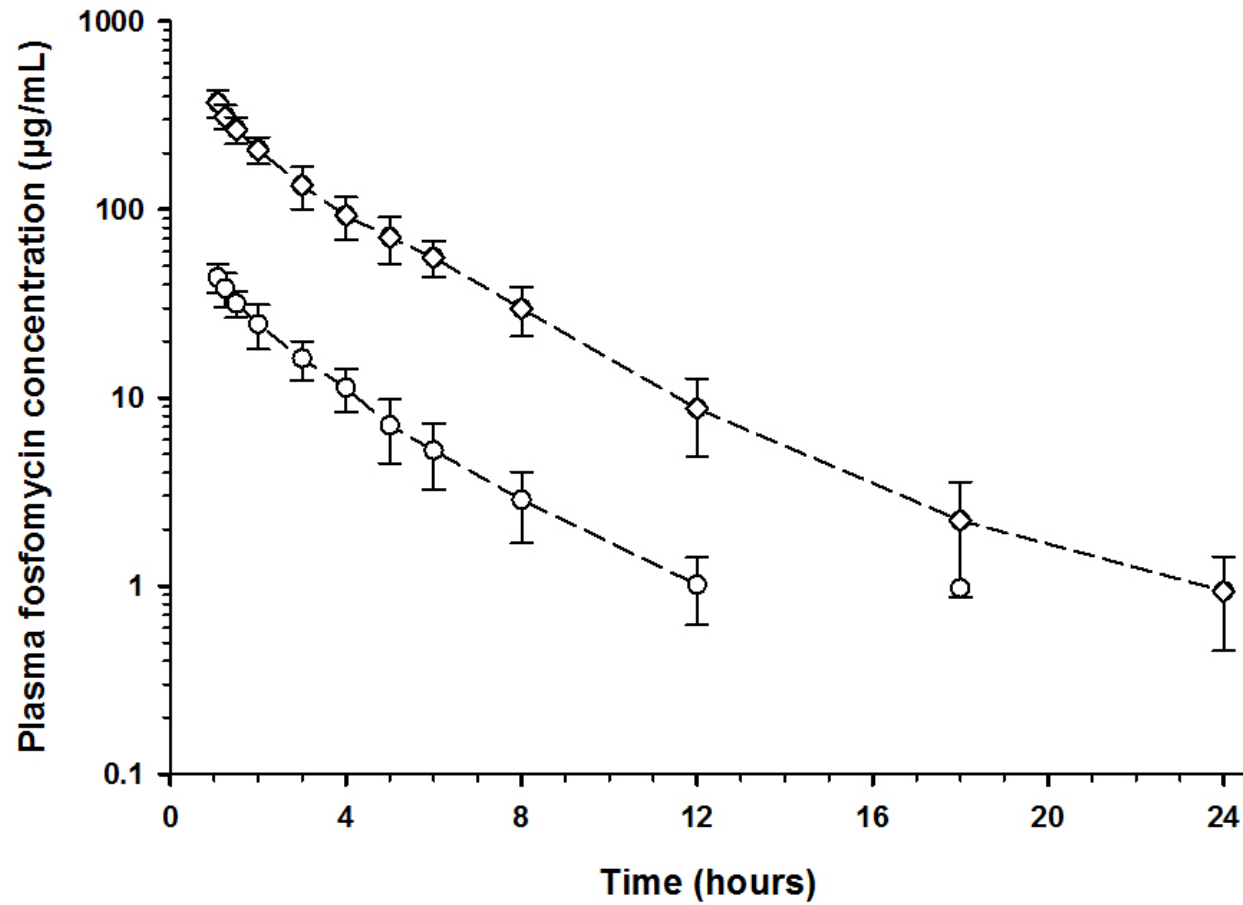

**SUPPLEMENTARY FIG 2.** Mean ( $\pm$  SD) concentration-versus-time profile of fosfomycin in plasma after a single dose of 3 g oral fosfomycin tromethamine. In plate A, all concentrations obtained through the 48 hour sampling point are included. Plate B, C, and D include concentrations collected through 36, 24, and 12 hours, respectively. The y axis is in the log scale.

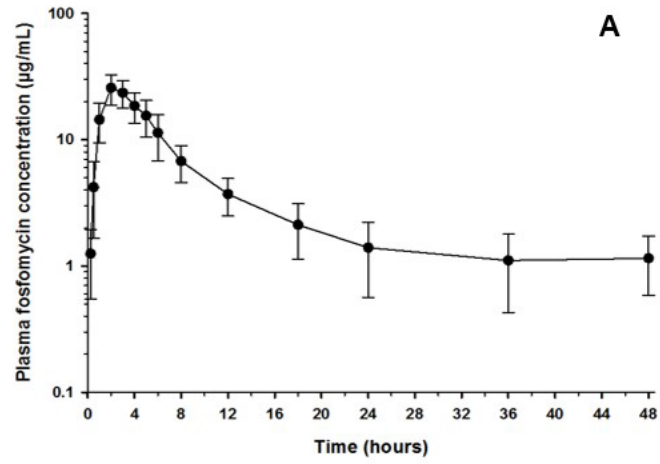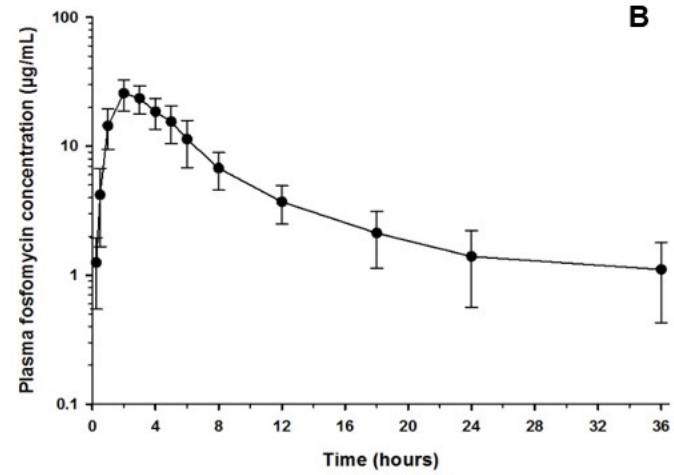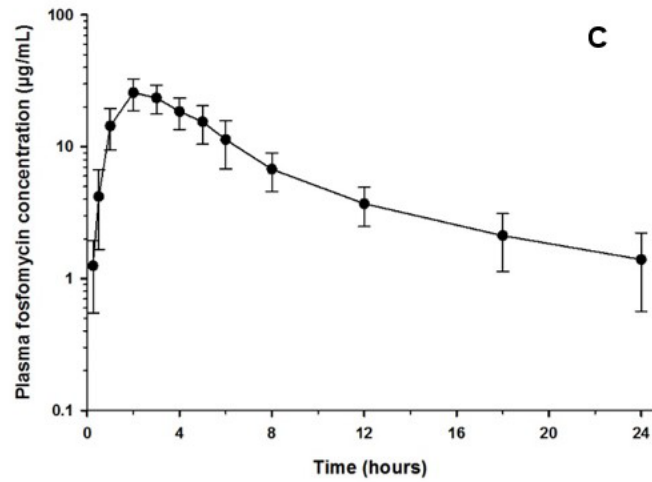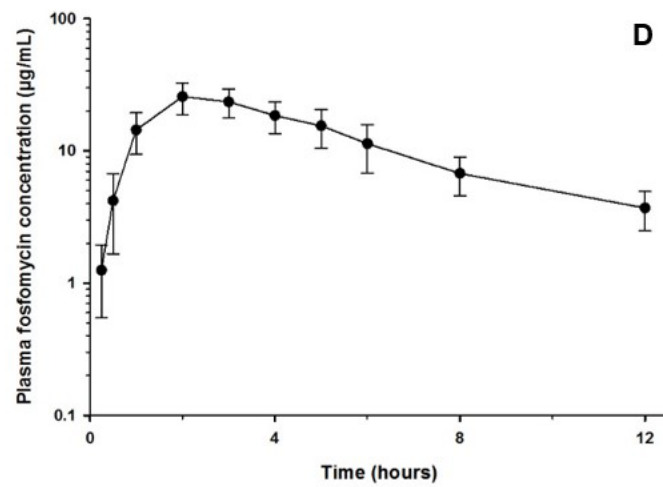

Supplement: AAC.00775-17_zac009176454s1.pdf [file AAC.00775-17_zac009176454s1.pdf]
